# Supplementary material for: Meta-analyses of Adverse Effects Data Derived from Randomised Controlled Trials as Compared to Observational Studies: Methodological Overview
Source: PubMed Central journal article supplement (PMC3086872; doi:10.1371/journal.pmed.1001026), 2011-05-03
Supplement: pmed.1001026.s003.pdf [file pmed.1001026.s003.pdf]

## Text S1. Sources searched for included studies

### *Databases*

All databases were originally searched on the 26<sup>th</sup> or 27<sup>th</sup> September 2007 with the most recent update searches carried out between the 22<sup>nd</sup> October and 6<sup>th</sup> November 2009.

Cochrane Database of Systematic Reviews (CDSR): methodology reviews only: 2009 Issue 4

Cochrane Methodology Register (CMR): 2009 Issue 4

Database of Abstracts of Reviews of Effects (DARE): November 2009

EMBASE: 1980 to 2009 Week 42

Health Technology Assessment (HTA) Database: November 2009

Health Management Information Consortium (HMIC): September 2009

Index to Theses: November 2009

Library, Information Science & Technology Abstracts (LISTA): Mid-1960s – October 2009

MEDLINE: 1950 to October Week 3

MEDLINE in process: 22 October 2009

### *Handsearching of Journals*

BMC Clinical Pharmacology - 2001;1(1) to 2009;9(17)

BMC Medical Research Methodology - 2001;1 to 2009;9(69)

Drug Safety – 1998;18(1) to 2009;32(11)

Health Information and Libraries Journal (formerly Health Libraries Review) - 1994;11(1) to 2009;26(3)

Journal of Clinical Epidemiology - 1998 to 2009;62(12)

Journal of Information Science - 1979;1(1) to 2009;35(5)

Journal of Librarianship and Information Science - 1969;1(1) to 2009;41(3)

Journal of the Medical Library Association (formerly the Bulletin of the Medical Library Association) - from 2000;88(2) to 2009;97(4)

Pharmacoepidemiology & Drug Safety – 1992;1(1) to 2009;18(11)

### *Handsearching of Conference Proceedings*

Cochrane Colloquia 1994 - 2009

HTAi 2004 - 2009

Pharma-Bio-Med Conference and Exposition 2006 - 2008

Symposium on Systematic Reviews 1998 - 2002

### *Web Sources*

Agency for Healthcare Research and Quality (AHRQ) via <http://www.ahrq.gov/> Searched: 28/10/09

Health Technology Assessment Programme (HTA) via <http://www.hta.ac.uk/index.shtml> Searched: 28/10/09
